# Supplementary material
Source: PubMed Central journal article supplement (PMC4548801)
Supplement: NIHMS650004-supplement-Supp_Material.pdf [file NIHMS650004-supplement-Supp_Material.pdf]

# **Blunted Suppression of Acyl-Ghrelin in Response to Fructose Ingestion in Obese Adolescents: the Role of Insulin Resistance**

Michelle Van Name<sup>1</sup>, Cosimo Giannini<sup>1</sup>, Nicola Santoro<sup>1</sup>, Ania Jastreboff<sup>1,2</sup>, Jessica Kubat<sup>1</sup>, Fangyong Li<sup>3</sup>, Romy Kursawe<sup>1</sup>, Mary Savoye<sup>1</sup>, Elvira Duran<sup>1</sup>, James Dziura<sup>3</sup>, Rajita Sinha<sup>4,5</sup>, Robert Sherwin<sup>2</sup>, Gary Cline<sup>2</sup> and Sonia Caprio<sup>1</sup>

## ***Corresponding author:***

- Sonia Caprio, Yale University School of Medicine, Department of Pediatrics, 330 Cedar Street, P.O. Box 208064, New Haven, CT 06520, Tel: 203-785-5692, Fax: 203-785-6421, email: Sonia.Caprio@yale.edu

## **Supplemental Methods:**

Liver fat content was measured by MRI using a GE or Siemens Sonata 1.5 Tesla system (1-4), using the 2-point Dixon method modified by Fishbein et al (5). Within the MRICro software program, five regions of interest were drawn on each image and mean pixel signal intensity was determined. The hepatic fat fraction (HFF percent) was calculated in duplicate based on the mean pixel signal intensity using the formula  $[(\text{Sin}-\text{Sout}) / (2 \times \text{Sin})] \times 100$ . Imaging parameters included were: matrix size = 128x256, flip angle ( $\alpha$ ) = 30°, TR = 18 ms, TEs = 2.38/ 4.76 ms out-of-phase and in-phase, respectively, bandwidth = 420 Hz/pixel, six averages, slice thickness = 10 mm, one slice, 2.3 seconds/slice (for 2 points), scan time = 14 seconds in a single breath-hold (6).

Validation of Fast-MRI against <sup>1</sup>H-NMR was previously performed in 28 lean and obese subjects, revealing a strong correlation between these two methods ( $r = 0.954$ ,  $p < 0.001$ ), and the within subject standard deviation HFF was 1.9%. (6).

## References

1. Cali AM, De Oliveira AM, Kim H, Chen S, Reyes-Mugica M, Escalera S, et al. Glucose dysregulation and hepatic steatosis in obese adolescents: is there a link? *Hepatology*. Jun 2009;49(6):1896-1903.
2. Santoro N, Kursawe R, D'Adamo E, Dykas DJ, Zhang CK, Bale AE, et al. A common variant in the patatin-like phospholipase 3 gene (PNPLA3) is associated with fatty liver disease in obese children and adolescents. *Hepatology*. Oct 2010;52(4):1281-1290.
3. Santoro N, Zhang CK, Zhao H, Pakstis AJ, Kim G, Kursawe R, et al. Variant in the glucokinase regulatory protein (GCKR) gene is associated with fatty liver in obese children and adolescents. *Hepatology*. Mar 2012;55(3):781-789.
4. Santoro N, Savoye M, Kim G, Marotto K, Shaw MM, Pierpont B, et al. Hepatic fat accumulation is modulated by the interaction between the rs738409 variant in the PNPLA3 gene and the dietary omega6/omega3 PUFA intake. *PloS one*. 2012;7(5):e37827.
5. Fishbein MH, Gardner KG, Potter CJ, Schmalbrock P, Smith MA. Introduction of fast MR imaging in the assessment of hepatic steatosis. *Magnetic resonance imaging*. 1997;15(3):287-293.
6. Kim H, Taksali SE, Dufour S, Befroy D, Goodman TR, Petersen KF, et al. Comparative MR study of hepatic fat quantification using single-voxel proton spectroscopy, two-point dixon and three-point IDEAL. *Magnetic resonance in medicine : official journal of the Society of Magnetic Resonance in Medicine / Society of Magnetic Resonance in Medicine*. Mar 2008;59(3):521-527.
